# Supplementary material for: Thermal Field Design of a Large-Sized SiC Using the Resistance Heating PVT Method via Simulations
Source: MDPI journal article supplement (doi:10.3390/cryst13121638), 2023-11-26
Supplement: s1 [file s1]

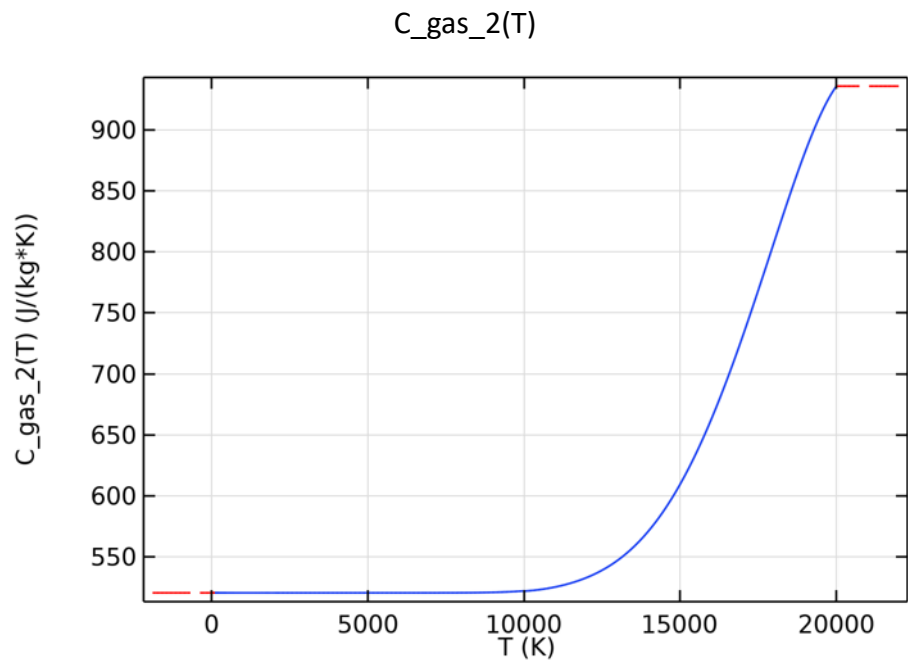

Figure S1 Heat capacity of Argon

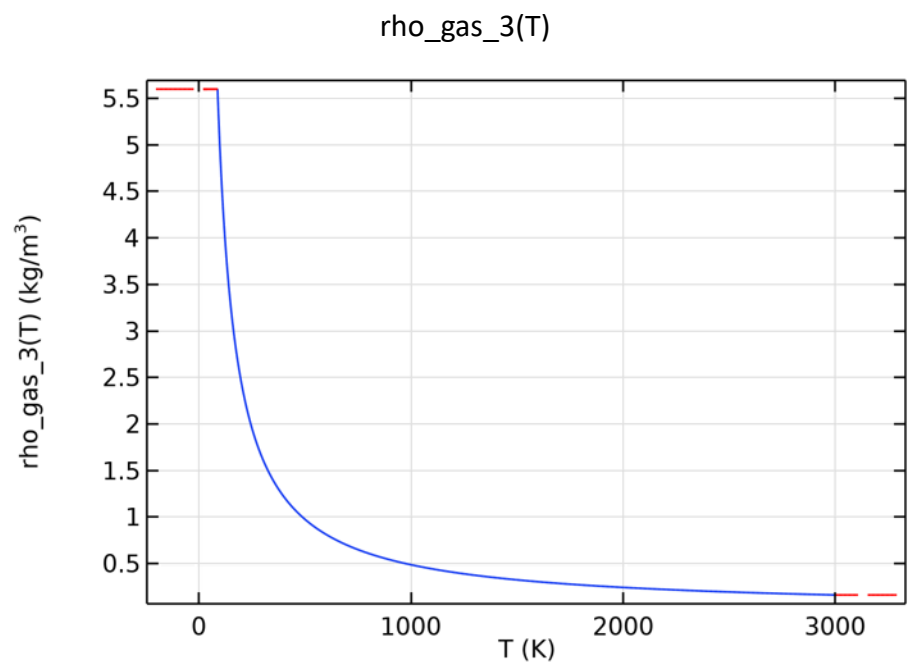

Figure S2 Density of Argon

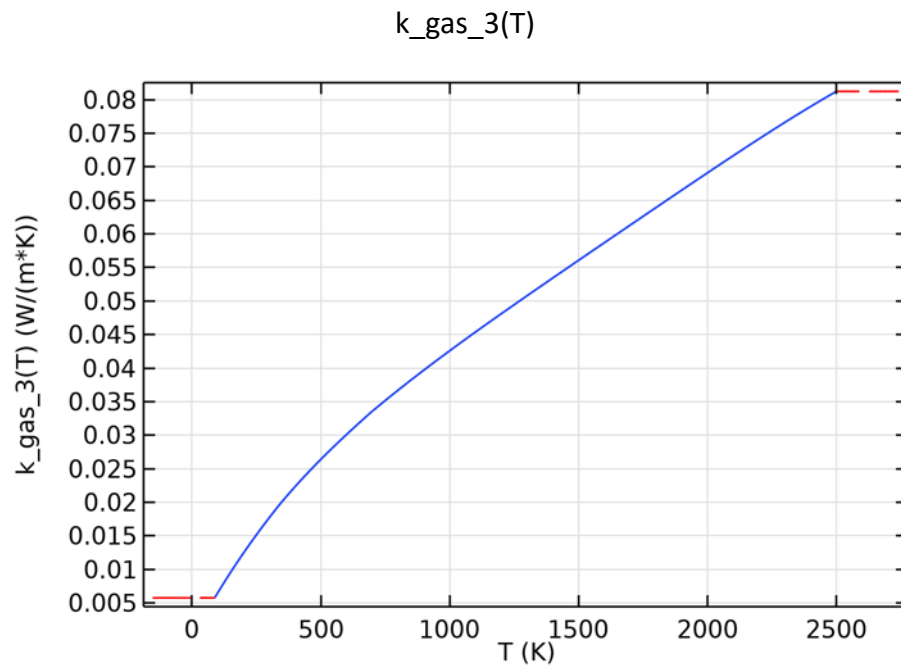

Figure S3 Thermal conductivity of Argon

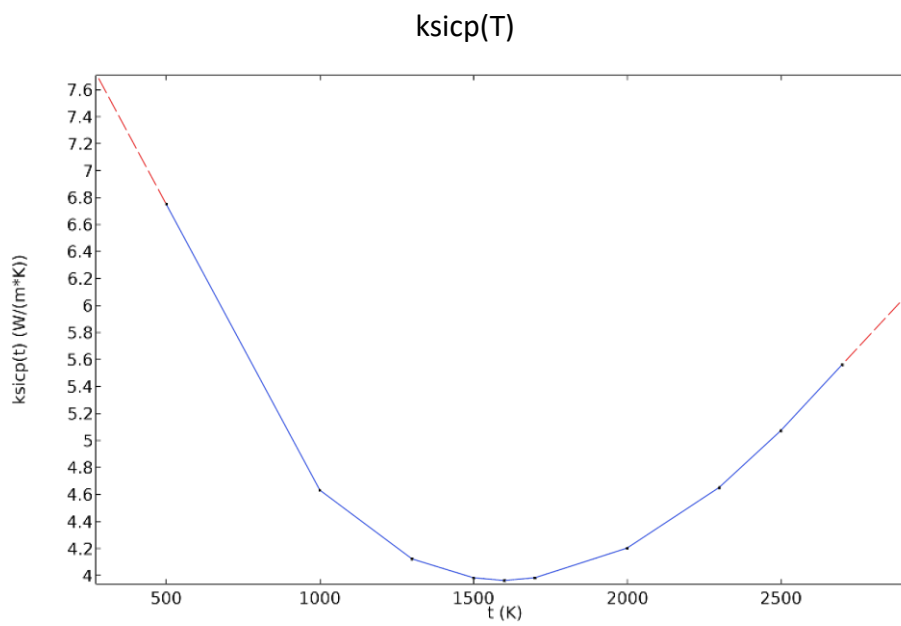

Figure S4 Thermal conductivity of SiC powder
